# Supplementary material for: Epigenetic Scanning of KEAP1 CpG Sites Uncovers New Molecular-Driven Patterns in Lung Adeno and Squamous Cell Carcinomas
Source: PubMed Central journal article supplement (PMC7554999; doi:10.3390/antiox9090904), 2020-09-22
Supplement: antioxidants-09-00904-s001.pdf [file antioxidants-09-00904-s001.pdf]

Table S1. List of methylation-converted sequences for each predicted *KEAP1* CpG site.

| CpG Island | sequence     |
|------------|--------------|
| cg25801292 | tggtccggcggc |
| cg02428100 | cgggacgccga  |
| cg26500801 | ccaccgcgcac  |
| cg03890664 | gcgcccgcgtg  |
| cg15676203 | ccgggcgcccgc |
| cg06911149 | gagcgcgcgag  |
| cg15204119 | gctcccggcca  |
| cg26988016 | cactgcgcaggg |
| cg20226327 | tgggacgggctg |
| cg10505024 | cgccccggctga |
| cg07695362 | tgcagcgggagt |
| cg00522555 | gcccgcggtgta |
| cg01018726 | gccatgatgac  |
| cg22779878 | ggagacgattga |
| cg02337283 | ctccacgctgtt |
| cg01586432 | gctgccggcatg |

**Supplemental Table S2.**

Results from correlation analysis between *KEAP1* methylation levels and its expression related to the *KRAS* status (**A** and **B**) in LUSC and LUAD (**C**, **D**, **E**, **F**).

Results from correlation analysis between *KEAP1* methylation levels and its expression related to the *EGFR* status in LUAD (**G**, **H**, **I**, **L**).

Results from correlation analysis between *KEAP1* methylation levels and its expression related to the smoking status in LUAD (**M**, **N**, **O**, **P**)

**A\_LUSC\_All stages\_KRAS mutated cohort**

| CpG* | CpG        | P value | R    |
|------|------------|---------|------|
| 1    | cg25801292 | 0,96    | 0,01 |
| 2    | cg02428100 | 0,69    | 0,11 |
| 3    | cg26500801 | 0,09    | 0,45 |
| 4    | cg03890664 | 0,11    | 0,43 |
| 5    | cg15676203 | 0,36    | 0,25 |
| 6    | cg06911149 | 0,14    | 0,40 |

|    |            |      |       |
|----|------------|------|-------|
| 7  | cg15204119 | 0,14 | 0,40  |
| 8  | cg26988016 | 0,05 | 0,53  |
| 9  | cg20226327 | 0,81 | -0,07 |
| 10 | cg10505024 | 0,80 | -0,07 |
| 11 | cg07695362 | 0,04 | -0,54 |
| 12 | cg00522555 | 0,25 | -0,32 |
| 13 | cg01018726 | 0,15 | -0,39 |
| 14 | cg22779878 | 0,51 | -0,19 |
| 15 | cg02337283 | 0,34 | -0,27 |
| 16 | cg01586432 | 0,29 | -0,29 |

*\*CpG number refers to the position of CpGs indicated in the legend of Figure 7.*

### **B\_LUSC\_All stages\_KRAS wild-type cohort**

| CpG* | CpG        | P value | R     |
|------|------------|---------|-------|
| 1    | cg25801292 | 0,00    | -0,18 |
| 2    | cg02428100 | 0,00    | -0,18 |
| 3    | cg26500801 | 0,38    | -0,05 |
| 4    | cg03890664 | 0,18    | 0,07  |
| 5    | cg15676203 | 0,03    | -0,12 |
| 6    | cg06911149 | 0,07    | -0,10 |
| 7    | cg15204119 | 0,00    | -0,18 |
| 8    | cg26988016 | 0,92    | 0,01  |
| 9    | cg20226327 | 0,00    | -0,28 |
| 10   | cg10505024 | 0,00    | -0,21 |
| 11   | cg07695362 | 0,00    | -0,26 |
| 12   | cg00522555 | 0,50    | 0,04  |
| 13   | cg01018726 | 0,01    | 0,13  |
| 14   | cg22779878 | 0,00    | -0,35 |
| 15   | cg02337283 | 0,03    | -0,12 |
| 16   | cg01586432 | 0,15    | -0,08 |

*\*CpG number refers to the position of CpGs indicated in the legend of Figure 7.*

### **C\_LUAD\_All Stages\_KRAS mutated cohort**

| CpG | CpG        | P value | R     |
|-----|------------|---------|-------|
| 1   | cg25801292 | 0,99    | 0,00  |
| 2   | cg02428100 | 0,41    | 0,11  |
| 3   | cg26500801 | 0,95    | -0,01 |
| 4   | cg03890664 | 0,18    | 0,17  |
| 5   | cg15676203 | 0,93    | -0,01 |
| 6   | cg06911149 | 0,62    | 0,06  |
| 7   | cg15204119 | 0,57    | 0,07  |
| 8   | cg26988016 | 0,70    | 0,05  |
| 9   | cg20226327 | 0,24    | -0,15 |
| 10  | cg10505024 | 0,39    | -0,11 |
| 11  | cg07695362 | 0,63    | -0,06 |

|    |            |      |       |
|----|------------|------|-------|
| 12 | cg00522555 | 0,55 | -0,08 |
| 13 | cg01018726 | 0,40 | -0,11 |
| 14 | cg22779878 | 0,12 | -0,20 |
| 15 | cg02337283 | 0,36 | 0,12  |
| 16 | cg01586432 | 0,14 | -0,19 |

*\*CpG number refers to the position of CpGs indicated in the legend of Figure 7.*

#### **D\_LUAD\_All Stages\_KRAS wild-type cohort**

| <b>CpG</b> | <b>CpG</b> | <b>P value</b> | <b>R</b> |
|------------|------------|----------------|----------|
| 1          | cg25801292 | 0,45           | -0,04    |
| 2          | cg02428100 | 0,05           | -0,10    |
| 3          | cg26500801 | 0,61           | -0,03    |
| 4          | cg03890664 | 0,03           | -0,11    |
| 5          | cg15676203 | 0,01           | -0,13    |
| 6          | cg06911149 | 0,02           | -0,12    |
| 7          | cg15204119 | 0,47           | -0,04    |
| 8          | cg26988016 | 0,64           | -0,02    |
| 9          | cg20226327 | 0,08           | -0,09    |
| 10         | cg10505024 | 0,08           | -0,09    |
| 11         | cg07695362 | 0,02           | -0,12    |
| 12         | cg00522555 | 0,08           | 0,09     |
| 13         | cg01018726 | 0,92           | -0,01    |
| 14         | cg22779878 | 0,01           | -0,12    |
| 15         | cg02337283 | 0,12           | 0,08     |
| 16         | cg01586432 | 0,92           | 0,00     |

*\*CpG number refers to the position of CpGs indicated in the legend of Figure 7.*

**E\_LUAD\_Non Metastatic\_KRAS mutated cohort**

| CpG | CpG        | P value | R     |
|-----|------------|---------|-------|
| 1   | cg25801292 | 0,97    | -0,01 |
| 2   | cg02428100 | 0,57    | 0,14  |
| 3   | cg26500801 | 0,77    | -0,07 |
| 4   | cg03890664 | 0,54    | 0,16  |
| 5   | cg15676203 | 0,22    | -0,30 |
| 6   | cg06911149 | 0,93    | 0,02  |
| 7   | cg15204119 | 0,77    | 0,08  |
| 8   | cg26988016 | 0,52    | -0,16 |
| 9   | cg20226327 | 0,87    | 0,04  |
| 10  | cg10505024 | 0,88    | 0,04  |
| 11  | cg07695362 | 0,64    | -0,12 |
| 12  | cg00522555 | 0,72    | 0,09  |
| 13  | cg01018726 | 0,70    | 0,10  |
| 14  | cg22779878 | 0,93    | -0,02 |
| 15  | cg02337283 | 0,04    | 0,49  |
| 16  | cg01586432 | 0,69    | -0,10 |

*\*CpG number refers to the position of CpGs indicated in the legend of Figure 7.*

**F\_LUAD\_Non Metastatic\_KRAS wild-type cohort**

| CpG | CpG        | P value | R     |
|-----|------------|---------|-------|
| 1   | cg25801292 | 0,13    | -0,15 |
| 2   | cg02428100 | 0,47    | -0,07 |
| 3   | cg26500801 | 0,70    | -0,04 |
| 4   | cg03890664 | 0,05    | -0,20 |
| 5   | cg15676203 | 0,38    | -0,09 |
| 6   | cg06911149 | 0,52    | -0,06 |
| 7   | cg15204119 | 0,28    | -0,11 |
| 8   | cg26988016 | 0,05    | -0,20 |
| 9   | cg20226327 | 0,64    | -0,05 |
| 10  | cg10505024 | 0,90    | -0,01 |
| 11  | cg07695362 | 0,10    | -0,16 |
| 12  | cg00522555 | 0,06    | 0,18  |
| 13  | cg01018726 | 0,55    | 0,06  |
| 14  | cg22779878 | 0,70    | -0,04 |
| 15  | cg02337283 | 0,11    | 0,16  |
| 16  | cg01586432 | 0,23    | 0,12  |

*\*CpG number refers to the position of CpGs indicated in the legend of Figure 7.*

### G\_LUAD\_All stages\_EGFR mutated cohort

| CpG | CpG        | P value | R     |
|-----|------------|---------|-------|
| 1   | cg25801292 | 0,61    | -0,03 |
| 2   | cg02428100 | 0,12    | -0,08 |
| 3   | cg26500801 | 0,82    | -0,01 |
| 4   | cg03890664 | 0,11    | -0,08 |
| 5   | cg15676203 | 0,03    | -0,11 |
| 6   | cg06911149 | 0,09    | -0,09 |
| 7   | cg15204119 | 0,36    | -0,05 |
| 8   | cg26988016 | 0,75    | -0,02 |
| 9   | cg20226327 | 0,01    | -0,13 |
| 10  | cg10505024 | 0,01    | -0,12 |
| 11  | cg07695362 | 0,01    | -0,13 |
| 12  | cg00522555 | 0,20    | 0,07  |
| 13  | cg01018726 | 0,82    | -0,01 |
| 14  | cg22779878 | 0,00    | -0,15 |
| 15  | cg02337283 | 0,15    | 0,07  |
| 16  | cg01586432 | 0,93    | 0,00  |

*\*CpG number refers to the position of CpGs indicated in the legend of Figure 7.*

### H\_LUAD\_All stages\_EGFR wild-type cohort

| CpG | CpG        | P value | R     |
|-----|------------|---------|-------|
| 1   | cg25801292 | 0,36    | -0,12 |
| 2   | cg02428100 | 0,35    | -0,13 |
| 3   | cg26500801 | 0,20    | -0,17 |
| 4   | cg03890664 | 0,94    | -0,01 |
| 5   | cg15676203 | 0,05    | -0,26 |
| 6   | cg06911149 | 0,09    | -0,23 |
| 7   | cg15204119 | 0,36    | 0,12  |
| 8   | cg26988016 | 0,94    | 0,01  |
| 9   | cg20226327 | 0,25    | 0,15  |
| 10  | cg10505024 | 0,21    | 0,17  |
| 11  | cg07695362 | 0,77    | -0,04 |
| 12  | cg00522555 | 0,24    | 0,16  |
| 13  | cg01018726 | 0,79    | 0,04  |
| 14  | cg22779878 | 0,85    | -0,02 |
| 15  | cg02337283 | 0,12    | 0,21  |
| 16  | cg01586432 | 0,48    | -0,09 |

*\*CpG number refers to the position of CpGs indicated in the legend of Figure 7.*

**I\_LUAD\_ Non Metastatic\_EGFR mutated cohort**

| of CpG | CpG        | Pvalue | R     |
|--------|------------|--------|-------|
| 1      | cg25801292 | 0,13   | -0,14 |
| 2      | cg02428100 | 0,80   | -0,02 |
| 3      | cg26500801 | 0,74   | -0,03 |
| 4      | cg03890664 | 0,05   | -0,18 |
| 5      | cg15676203 | 0,24   | -0,11 |
| 6      | cg06911149 | 0,59   | -0,05 |
| 7      | cg15204119 | 0,61   | -0,05 |
| 8      | cg26988016 | 0,05   | -0,18 |
| 9      | cg20226327 | 0,65   | -0,04 |
| 10     | cg10505024 | 0,96   | -0,01 |
| 11     | cg07695362 | 0,07   | -0,17 |
| 12     | cg00522555 | 0,06   | 0,17  |
| 13     | cg01018726 | 0,45   | 0,07  |
| 14     | cg22779878 | 0,71   | -0,03 |
| 15     | cg02337283 | 0,03   | 0,20  |
| 16     | cg01586432 | 0,30   | 0,10  |

*\*CpG number refers to the position of CpGs indicated in the legend of Figure 7.*

**L\_LUAD\_ Non Metastatic\_EGFR wild-type cohort**

| CpG | CpG        | P value | R     |
|-----|------------|---------|-------|
| 1   | cg25801292 | 1,00    | 0,50  |
| 2   | cg02428100 | 1,00    | -0,50 |
| 3   | cg26500801 | 1,00    | -0,50 |
| 4   | cg03890664 | 0,33    | 1,00  |
| 5   | cg15676203 | 1,00    | -0,50 |
| 6   | cg06911149 | 1,00    | -0,50 |
| 7   | cg15204119 | 0,33    | -1,00 |
| 8   | cg26988016 | 1,00    | -0,50 |
| 9   | cg20226327 | 1,00    | -0,50 |
| 10  | cg10505024 | 1,00    | -0,50 |
| 11  | cg07695362 | 1,00    | -0,50 |
| 12  | cg00522555 | 1,00    | 0,00  |
| 13  | cg01018726 | 1,00    | 0,50  |
| 14  | cg22779878 | 0,33    | -1,00 |
| 15  | cg02337283 | 1,00    | 0,50  |
| 16  | cg01586432 | 0,33    | -1,00 |

*\*CpG number refers to the position of CpGs indicated in the legend of Figure 7.*

### M\_LUAD\_All stages\_smoking cohort

| CpG | CpG        | P value | R      |
|-----|------------|---------|--------|
| 1   | cg25801292 | 0,309   | -0,049 |
| 2   | cg02428100 | 0,079   | -0,084 |
| 3   | cg26500801 | 0,582   | -0,026 |
| 4   | cg03890664 | 0,151   | -0,069 |
| 5   | cg15676203 | 0,005   | -0,133 |
| 6   | cg06911149 | 0,042   | -0,097 |
| 7   | cg15204119 | 0,414   | -0,039 |
| 8   | cg26988016 | 0,679   | -0,020 |
| 9   | cg20226327 | 0,062   | -0,089 |
| 10  | cg10505024 | 0,059   | -0,090 |
| 11  | cg07695362 | 0,012   | -0,120 |
| 12  | cg00522555 | 0,094   | 0,080  |
| 13  | cg01018726 | 0,933   | -0,004 |
| 14  | cg22779878 | 0,004   | -0,136 |
| 15  | cg02337283 | 0,053   | 0,093  |
| 16  | cg01586432 | 0,733   | -0,016 |

*\*CpG number refers to the position of CpGs indicated in the legend of Figure 7.*

### N\_LUAD\_All stages\_non-smoking cohort

| CpG | CpG        | P value | R     |
|-----|------------|---------|-------|
| 1   | cg25801292 | 0,18    | 0,38  |
| 2   | cg02428100 | 1,00    | 0,00  |
| 3   | cg26500801 | 0,50    | 0,20  |
| 4   | cg03890664 | 0,16    | -0,40 |
| 5   | cg15676203 | 0,49    | 0,20  |
| 6   | cg06911149 | 0,94    | -0,02 |
| 7   | cg15204119 | 0,30    | 0,30  |
| 8   | cg26988016 | 0,51    | -0,19 |
| 9   | cg20226327 | 0,50    | -0,20 |
| 10  | cg10505024 | 0,36    | -0,27 |
| 11  | cg07695362 | 0,53    | -0,18 |
| 12  | cg00522555 | 0,30    | 0,30  |
| 13  | cg01018726 | 0,28    | 0,31  |
| 14  | cg22779878 | 1,00    | 0,00  |
| 15  | cg02337283 | 0,35    | -0,27 |
| 16  | cg01586432 | 0,83    | 0,06  |

*\*CpG number refers to the position of CpGs indicated in the legend of Figure 7.*





**O\_LUAD\_Non metastatic\_smoking cohort**

| CpG | CpG        | P value | R     |
|-----|------------|---------|-------|
| 1   | cg25801292 | 0,11    | -0,15 |
| 2   | cg02428100 | 0,48    | -0,07 |
| 3   | cg26500801 | 0,62    | -0,05 |
| 4   | cg03890664 | 0,11    | -0,15 |
| 5   | cg15676203 | 0,19    | -0,12 |
| 6   | cg06911149 | 0,44    | -0,07 |
| 7   | cg15204119 | 0,46    | -0,07 |
| 8   | cg26988016 | 0,03    | -0,20 |
| 9   | cg20226327 | 0,56    | -0,05 |
| 10  | cg10505024 | 0,81    | -0,02 |
| 11  | cg07695362 | 0,09    | -0,15 |
| 12  | cg00522555 | 0,05    | 0,18  |
| 13  | cg01018726 | 0,42    | 0,07  |
| 14  | cg22779878 | 0,55    | -0,05 |
| 15  | cg02337283 | 0,04    | 0,19  |
| 16  | cg01586432 | 0,33    | 0,09  |

\*CpG number refers to the position of CpGs indicated in the legend of Figure 7.

**P\_LUAD\_Non metastatic\_non-smoking cohort**

| CpG | CpG        | P value | R    |
|-----|------------|---------|------|
| 1   | cg25801292 | 1,0     | 1,0  |
| 2   | cg02428100 | 1,0     | 1,0  |
| 3   | cg26500801 | 1,0     | 1,0  |
| 4   | cg03890664 | 1,0     | -1,0 |
| 5   | cg15676203 | 1,0     | -1,0 |
| 6   | cg06911149 | 1,0     | 1,0  |
| 7   | cg15204119 | 1,0     | -1,0 |
| 8   | cg26988016 | 1,0     | 1,0  |
| 9   | cg20226327 | 1,0     | 1,0  |
| 10  | cg10505024 | 1,0     | 1,0  |
| 11  | cg07695362 | 1,0     | -1,0 |
| 12  | cg00522555 | 1,0     | 1,0  |
| 13  | cg01018726 | 1,0     | 1,0  |
| 14  | cg22779878 | 1,0     | 1,0  |
| 15  | cg02337283 | 1,0     | 1,0  |
| 16  | cg01586432 | 1,0     | -1,0 |

\*CpG number refers to the position of CpGs indicated in the legend of Figure 7.

**Supplemental Table 3.** Details on cancer cell lines used for in silico prediction analysis at exon3 CpG island (CGI-2).

| Cell line | Derivation | Tissue | Details |
|-----------|------------|--------|---------|
|-----------|------------|--------|---------|

|         |                                 |            |                                                                                                                                                                                                 |
|---------|---------------------------------|------------|-------------------------------------------------------------------------------------------------------------------------------------------------------------------------------------------------|
| A459    | lung carcinoma tissue           | epithelium | <a href="https://genome.ucsc.edu/cgi-bin/hgEncodeVocab?ra=encode%2Fcv.ra&amp;term=%22A549%22">https://genome.ucsc.edu/cgi-bin/hgEncodeVocab?ra=encode%2Fcv.ra&amp;term=%22A549%22</a>           |
| HepG2   | hepatocellular carcinoma        | liver      | <a href="https://genome.ucsc.edu/cgi-bin/hgEncodeVocab?ra=encode%2Fcv.ra&amp;term=%22HepG2%22">https://genome.ucsc.edu/cgi-bin/hgEncodeVocab?ra=encode%2Fcv.ra&amp;term=%22HepG2%22</a>         |
| MCF-7   | mammary gland adenocarcinoma    | breast     | <a href="https://genome.ucsc.edu/cgi-bin/hgEncodeVocab?ra=encode%2Fcv.ra&amp;term=%22MCF%2D7%22">https://genome.ucsc.edu/cgi-bin/hgEncodeVocab?ra=encode%2Fcv.ra&amp;term=%22MCF%2D7%22</a>     |
| Caco-2  | large intestine, adenocarcinoma | colon      | <a href="https://genome.ucsc.edu/cgi-bin/hgEncodeVocab?ra=encode%2Fcv.ra&amp;term=%22Caco%2D2%22">https://genome.ucsc.edu/cgi-bin/hgEncodeVocab?ra=encode%2Fcv.ra&amp;term=%22Caco%2D2%22</a>   |
| HCT-116 | colorectal carcinoma            | colon      | <a href="https://genome.ucsc.edu/cgi-bin/hgEncodeVocab?ra=encode%2Fcv.ra&amp;term=%22HCT%2D116%22">https://genome.ucsc.edu/cgi-bin/hgEncodeVocab?ra=encode%2Fcv.ra&amp;term=%22HCT%2D116%22</a> |
| LNCaP   | prostate adenocarcinoma         | prostate   | <a href="https://genome.ucsc.edu/cgi-bin/hgEncodeVocab?ra=encode%2Fcv.ra&amp;term=%22LNCaP%22">https://genome.ucsc.edu/cgi-bin/hgEncodeVocab?ra=encode%2Fcv.ra&amp;term=%22LNCaP%22</a>         |
| Ovcar-3 | ovarian adenocarcinoma          | ovary      | <a href="https://genome.ucsc.edu/cgi-bin/hgEncodeVocab?ra=encode%2Fcv.ra&amp;term=%22ovcar%2D3%22">https://genome.ucsc.edu/cgi-bin/hgEncodeVocab?ra=encode%2Fcv.ra&amp;term=%22ovcar%2D3%22</a> |
| PANC-1  | pancreatic carcinoma            | pancreas   | <a href="https://genome.ucsc.edu/cgi-bin/hgEncodeVocab?ra=encode%2Fcv.ra&amp;term=%22PANC%2D1%22">https://genome.ucsc.edu/cgi-bin/hgEncodeVocab?ra=encode%2Fcv.ra&amp;term=%22PANC%2D1%22</a>   |
| PFSK-1  | cerebral brain tumor            | brain      | <a href="https://genome.ucsc.edu/cgi-bin/hgEncodeVocab?ra=encode%2Fcv.ra&amp;term=%22PFSK%2D1%22">https://genome.ucsc.edu/cgi-bin/hgEncodeVocab?ra=encode%2Fcv.ra&amp;term=%22PFSK%2D1%22</a>   |
| T-47D   | mammary ductal carcinoma        | breast     | <a href="https://genome.ucsc.edu/cgi-bin/hgEncodeVocab?ra=encode%2Fcv.ra&amp;term=%22T%2D47D%22">https://genome.ucsc.edu/cgi-bin/hgEncodeVocab?ra=encode%2Fcv.ra&amp;term=%22T%2D47D%22</a>     |
| U87     | glioblastoma, astrocytoma       | brain      | <a href="https://genome.ucsc.edu/cgi-bin/hgEncodeVocab?ra=encode%2Fcv.ra&amp;term=%22U87%22">https://genome.ucsc.edu/cgi-bin/hgEncodeVocab?ra=encode%2Fcv.ra&amp;term=%22U87%22</a>             |

---

Details on cell lines are from [https://genome.ucsc.edu/cgi-bin/hgTrackUi?hgsid=878021343\\_bibLdVTxAvl8paf1lnSpeD30jwoh&c=chr19&g=wgEncodeHaibMethyl450](https://genome.ucsc.edu/cgi-bin/hgTrackUi?hgsid=878021343_bibLdVTxAvl8paf1lnSpeD30jwoh&c=chr19&g=wgEncodeHaibMethyl450)

**Table S4.** Significant *KEAP1* CpG site marked in bold in LUSC non-neoplastic cohort.

| <i>Correlation between CpG methylation and protein levels</i> |                |
|---------------------------------------------------------------|----------------|
| <i>Pearson's correlation coefficient (R)</i>                  | <i>p value</i> |
| 0,22                                                          | 0,03           |
| -0,06                                                         | 0,57           |
| -0,03                                                         | 0,76           |
| 0,10                                                          | 0,35           |
| 0,00                                                          | 0,99           |
| 0,10                                                          | 0,36           |
| 0,13                                                          | 0,20           |
| 0,32                                                          | 0,00           |
| 0,11                                                          | 0,29           |
| -0,06                                                         | 0,59           |
| 0,06                                                          | 0,60           |
| -0,15                                                         | 0,15           |
| -0,19                                                         | 0,08           |
| -0,02                                                         | 0,82           |
| -0,06                                                         | 0,54           |
| -0,08                                                         | 0,46           |

### Supplemental Table S5.

Results from correlation analysis between KEAP1 methylation levels and expression of NRF2 and ARE-targets in LUAD (A, B).

Results from correlation analysis between KEAP1 methylation levels and expression of NRF2 and ARE-targets in LUSC (C).

#### A\_LUAD\_All stages\_NRF2 and ARE-targets.

| CpG* | CpG        | NRF2    |       | GCLC    |       | ABCC2   |       | PGD     |       | GPX2    |       | AKR1C1  |       | TXNRD1  |       | SRXN1   |       |
|------|------------|---------|-------|---------|-------|---------|-------|---------|-------|---------|-------|---------|-------|---------|-------|---------|-------|
|      |            | P value | R     | P value | R     | P value | R     | P value | R     | P value | R     | P value | R     | P value | R     | P value | R     |
| 1    | cg25801292 | 0,13    | 0,07  | 0,03    | -0,10 | 0,69    | 0,02  | 0,00    | -0,16 | 0,05    | -0,09 | 0,08    | -0,08 | 0,25    | -0,05 | 0,01    | -0,12 |
| 2    | cg02428100 | 0,88    | -0,01 | 0,95    | 0,00  | 0,31    | 0,05  | 0,99    | 0,00  | 0,15    | 0,07  | 0,90    | 0,01  | 0,38    | 0,04  | 0,91    | 0,01  |
| 3    | cg26500801 | 0,13    | 0,07  | 0,21    | -0,06 | 0,02    | 0,11  | 0,37    | -0,04 | 0,61    | 0,02  | 0,58    | -0,03 | 0,45    | 0,04  | 0,12    | -0,07 |
| 4    | cg03890664 | 0,57    | 0,03  | 0,90    | -0,01 | 0,96    | 0,00  | 0,16    | -0,07 | 0,56    | -0,03 | 0,86    | -0,01 | 0,20    | 0,06  | 0,23    | -0,06 |
| 5    | cg15676203 | 0,88    | -0,01 | 0,62    | 0,02  | 0,04    | 0,10  | 0,85    | -0,01 | 0,01    | 0,12  | 0,56    | 0,03  | 0,73    | 0,02  | 0,28    | -0,05 |
| 6    | cg06911149 | 0,03    | -0,10 | 0,62    | -0,02 | 0,01    | 0,11  | 0,60    | -0,03 | 0,08    | 0,08  | 0,91    | 0,01  | 0,20    | 0,06  | 0,22    | -0,06 |
| 7    | cg15204119 | 0,41    | 0,04  | 0,33    | 0,05  | 0,59    | -0,03 | 0,40    | 0,04  | 0,43    | -0,04 | 0,24    | -0,06 | 0,89    | 0,01  | 0,78    | 0,01  |
| 8    | cg26988016 | 0,99    | 0,00  | 0,86    | -0,01 | 0,57    | 0,03  | 0,38    | 0,04  | 0,38    | -0,04 | 0,15    | -0,07 | 0,02    | 0,11  | 0,15    | -0,07 |
| 9    | cg20226327 | 0,65    | -0,02 | 0,07    | -0,09 | 0,00    | -0,17 | 0,00    | -0,19 | 0,00    | -0,36 | 0,00    | -0,31 | 0,00    | -0,15 | 0,00    | -0,16 |
| 10   | cg10505024 | 0,57    | -0,03 | 0,23    | -0,06 | 0,00    | -0,17 | 0,00    | -0,16 | 0,00    | -0,28 | 0,00    | -0,28 | 0,17    | -0,06 | 0,03    | -0,10 |
| 11   | cg07695362 | 0,42    | -0,04 | 0,92    | 0,00  | 0,00    | -0,18 | 0,61    | -0,02 | 0,01    | -0,12 | 0,00    | -0,14 | 0,16    | -0,07 | 0,76    | 0,01  |
| 12   | cg00522555 | 0,89    | -0,01 | 0,12    | -0,07 | 0,17    | -0,06 | 0,00    | -0,14 | 0,34    | -0,05 | 0,24    | -0,06 | 0,00    | -0,13 | 0,41    | -0,04 |
| 13   | cg01018726 | 0,24    | -0,06 | 0,06    | -0,09 | 0,28    | -0,05 | 0,16    | -0,07 | 0,25    | -0,05 | 0,17    | -0,06 | 0,28    | -0,05 | 0,97    | 0,00  |
| 14   | cg22779878 | 0,02    | -0,11 | 0,05    | -0,09 | 0,01    | -0,13 | 0,00    | -0,16 | 0,00    | -0,25 | 0,00    | -0,33 | 0,26    | -0,05 | 0,01    | -0,12 |
| 15   | cg02337283 | 0,51    | 0,03  | 0,62    | 0,02  | 0,18    | -0,06 | 0,13    | 0,07  | 0,48    | 0,03  | 0,43    | -0,04 | 0,64    | -0,02 | 0,01    | 0,12  |
| 16   | cg01586432 | 0,62    | -0,02 | 0,00    | -0,20 | 0,00    | -0,26 | 0,00    | -0,13 | 0,00    | -0,26 | 0,00    | -0,26 | 0,02    | -0,11 | 0,04    | -0,10 |

\*CpG number refers to the position of CpGs indicated in the legend of Figure 8.

**B\_LUAD\_Non-metastatic\_NRF2 and ARE-targets.**

| CpG* | CpG        | NRF2    |       | GCLC    |       | ABCC2   |       | PGD     |       | GPX2    |       | AKR1C1  |       | TXNRD1  |       | SRXN1   |       |
|------|------------|---------|-------|---------|-------|---------|-------|---------|-------|---------|-------|---------|-------|---------|-------|---------|-------|
|      |            | P value | R     | P value | R     | P value | R     | P value | R     | P value | R     | P value | R     | P value | R     | P value | R     |
| 1    | cg25801292 | 0,18    | 0,12  | 0,34    | -0,09 | 0,56    | 0,05  | 0,32    | -0,09 | 0,01    | -0,22 | 0,02    | -0,21 | 0,48    | -0,06 | 0,00    | -0,31 |
| 2    | cg02428100 | 0,84    | 0,02  | 0,27    | 0,10  | 0,10    | 0,15  | 0,40    | -0,08 | 0,72    | 0,03  | 0,77    | -0,03 | 0,30    | 0,09  | 0,32    | 0,09  |
| 3    | cg26500801 | 0,37    | 0,08  | 0,79    | -0,02 | 0,72    | 0,03  | 0,05    | -0,18 | 0,32    | -0,09 | 0,17    | -0,12 | 0,87    | 0,02  | 0,11    | -0,15 |
| 4    | cg03890664 | 0,35    | 0,09  | 0,38    | -0,08 | 0,73    | 0,03  | 0,06    | -0,17 | 0,30    | -0,09 | 0,91    | 0,01  | 0,10    | 0,15  | 0,58    | -0,05 |
| 5    | cg15676203 | 0,15    | 0,13  | 0,70    | 0,04  | 0,81    | 0,02  | 0,28    | -0,10 | 0,53    | 0,06  | 1,00    | 0,00  | 0,12    | 0,14  | 0,33    | -0,09 |
| 6    | cg06911149 | 0,79    | -0,02 | 0,92    | 0,01  | 0,09    | 0,15  | 0,04    | -0,18 | 1,00    | 0,00  | 0,32    | -0,09 | 0,08    | 0,16  | 0,51    | -0,06 |
| 7    | cg15204119 | 0,66    | 0,04  | 0,69    | 0,04  | 0,17    | -0,12 | 0,81    | -0,02 | 0,00    | -0,28 | 0,01    | -0,23 | 0,84    | -0,02 | 0,65    | -0,04 |
| 8    | cg26988016 | 0,24    | 0,11  | 0,63    | 0,04  | 0,07    | 0,17  | 0,72    | -0,03 | 0,13    | -0,14 | 0,94    | -0,01 | 0,00    | 0,31  | 0,63    | -0,04 |
| 9    | cg20226327 | 0,71    | -0,03 | 0,99    | 0,00  | 0,77    | -0,03 | 0,15    | -0,13 | 0,00    | -0,27 | 0,06    | -0,17 | 0,79    | -0,02 | 0,22    | -0,11 |
| 10   | cg10505024 | 0,27    | -0,10 | 0,33    | -0,09 | 0,19    | -0,12 | 0,54    | -0,06 | 0,01    | -0,22 | 0,04    | -0,18 | 0,99    | 0,00  | 0,56    | -0,05 |
| 11   | cg07695362 | 0,23    | -0,11 | 0,84    | 0,02  | 0,24    | -0,11 | 0,67    | -0,04 | 0,23    | -0,11 | 0,28    | -0,10 | 0,33    | -0,09 | 0,79    | -0,02 |
| 12   | cg00522555 | 0,01    | -0,23 | 0,53    | -0,06 | 0,44    | -0,07 | 0,44    | -0,07 | 0,48    | 0,07  | 0,32    | -0,09 | 0,04    | -0,19 | 0,50    | 0,06  |
| 13   | cg01018726 | 0,11    | -0,15 | 0,25    | -0,10 | 0,04    | -0,19 | 0,95    | 0,01  | 0,53    | 0,06  | 0,42    | -0,07 | 0,10    | -0,15 | 1,00    | 0,00  |
| 14   | cg22779878 | 0,02    | -0,21 | 0,02    | -0,22 | 0,14    | -0,13 | 0,50    | -0,06 | 0,09    | -0,16 | 0,00    | -0,27 | 0,87    | 0,02  | 0,42    | -0,07 |
| 15   | cg02337283 | 0,64    | -0,04 | 0,55    | 0,05  | 0,57    | -0,05 | 0,29    | 0,10  | 0,57    | -0,05 | 0,04    | -0,19 | 0,88    | 0,01  | 0,26    | 0,10  |
| 16   | cg01586432 | 0,71    | -0,03 | 0,01    | -0,22 | 0,00    | -0,26 | 0,17    | -0,12 | 0,16    | -0,13 | 0,05    | -0,17 | 0,79    | -0,02 | 0,66    | -0,04 |

\*CpG number refers to the position of CpGs indicated in the legend of Figure 8.

**C\_LUSC\_All stages\_NRF2 and ARE-targets.**

|             |            | <b>NRF2</b> |       | <b>GCLC</b> |       | <b>ABCC2</b> |       | <b>PGD</b> |       | <b>GPX2</b> |       | <b>AKR1C1</b> |       | <b>TXNRD1</b> |       | <b>SRXN1</b> |       |
|-------------|------------|-------------|-------|-------------|-------|--------------|-------|------------|-------|-------------|-------|---------------|-------|---------------|-------|--------------|-------|
| <b>CpG*</b> | <b>CpG</b> | P value     | R     | P value     | R     | P value      | R     | P value    | R     | P value     | R     | P value       | R     | P value       | R     | P value      | R     |
| 1           | cg25801292 | 0,00        | -0,24 | 0,00        | -0,18 | 0,66         | 0,02  | 0,00       | -0,16 | 0,00        | -0,20 | 0,00          | -0,16 | 0,04          | -0,11 | 0,29         | -0,06 |
| 2           | cg02428100 | 0,09        | -0,09 | 0,33        | 0,05  | 0,97         | 0,00  | 0,38       | -0,05 | 0,29        | -0,06 | 0,35          | -0,05 | 0,93          | 0,00  | 0,23         | -0,06 |
| 3           | cg26500801 | 0,15        | -0,08 | 0,99        | 0,00  | 0,86         | 0,01  | 0,08       | -0,09 | 0,39        | -0,05 | 0,12          | -0,08 | 0,41          | -0,04 | 0,28         | -0,06 |
| 4           | cg03890664 | 0,78        | 0,01  | 0,08        | 0,09  | 0,31         | 0,05  | 0,72       | 0,02  | 0,37        | 0,05  | 0,55          | 0,03  | 0,24          | 0,06  | 0,99         | 0,00  |
| 5           | cg15676203 | 0,04        | -0,11 | 0,89        | -0,01 | 0,35         | 0,05  | 0,38       | -0,05 | 0,40        | -0,04 | 0,41          | -0,04 | 0,68          | -0,02 | 0,93         | 0,00  |
| 6           | cg06911149 | 0,30        | -0,05 | 0,52        | 0,03  | 0,27         | 0,06  | 0,18       | -0,07 | 0,52        | -0,03 | 0,37          | -0,05 | 0,27          | -0,06 | 0,44         | -0,04 |
| 7           | cg15204119 | 0,23        | -0,06 | 0,52        | -0,03 | 0,79         | 0,01  | 0,07       | -0,10 | 0,99        | 0,00  | 0,07          | -0,09 | 0,03          | -0,11 | 0,06         | -0,10 |
| 8           | cg26988016 | 0,99        | 0,00  | 0,13        | -0,08 | 0,91         | 0,01  | 0,02       | -0,12 | 0,02        | -0,12 | 0,08          | -0,09 | 0,05          | -0,10 | 0,06         | -0,10 |
| 9           | cg20226327 | 0,00        | -0,22 | 0,00        | -0,20 | 0,01         | -0,13 | 0,00       | -0,25 | 0,00        | -0,26 | 0,00          | -0,22 | 0,00          | -0,18 | 0,00         | -0,18 |
| 10          | cg10505024 | 0,00        | -0,24 | 0,00        | -0,22 | 0,14         | -0,08 | 0,00       | -0,16 | 0,00        | -0,18 | 0,00          | -0,18 | 0,01          | -0,14 | 0,03         | -0,12 |
| 11          | cg07695362 | 0,03        | -0,11 | 0,02        | -0,12 | 0,08         | -0,09 | 0,08       | -0,09 | 0,01        | -0,14 | 0,01          | -0,13 | 0,03          | -0,11 | 0,07         | -0,09 |
| 12          | cg00522555 | 0,63        | 0,03  | 0,65        | -0,02 | 0,12         | -0,08 | 0,40       | -0,04 | 0,92        | -0,01 | 0,60          | -0,03 | 0,51          | -0,03 | 0,15         | -0,08 |
| 13          | cg01018726 | 0,37        | 0,05  | 0,37        | -0,05 | 0,79         | -0,01 | 0,42       | 0,04  | 0,69        | 0,02  | 0,41          | 0,04  | 0,73          | -0,02 | 0,89         | -0,01 |
| 14          | cg22779878 | 0,00        | -0,35 | 0,00        | -0,27 | 0,86         | -0,01 | 0,00       | -0,22 | 0,00        | -0,28 | 0,00          | -0,27 | 0,00          | -0,21 | 0,01         | -0,14 |
| 15          | cg02337283 | 0,11        | -0,08 | 0,02        | -0,12 | 0,05         | -0,10 | 0,43       | -0,04 | 0,02        | -0,12 | 0,02          | -0,13 | 0,07          | -0,10 | 0,53         | -0,03 |
| 16          | cg01586432 | 0,03        | -0,11 | 0,14        | -0,08 | 0,09         | 0,09  | 0,53       | 0,03  | 0,87        | -0,01 | 0,97          | 0,00  | 0,34          | 0,05  | 0,07         | 0,09  |

\*CpG number refers to the position of CpGs indicated in the legend of Figure 8.

**Supplemental Table S6. Results from correlation analysis between KEAP1 methylation levels and expression of NRF2 and ARE-targets in LUAD and LUSC EGFR/KRAS subpopulations.**

Results from correlation analysis between KEAP1 methylation levels and expression of NRF2 and ARE-targets in EGFR wild type/mutated in LUAD early stages (A, B).

Results from correlation analysis between KEAP1 methylation levels and expression of NRF2 and ARE-targets in EGFR wild type/mutated in LUAD all stages (**C, D**).

Results from correlation analysis between KEAP1 methylation levels and expression of NRF2 and ARE-targets in KRAS wild type/mutated in LUAD early stages (**E, F**).

Results from correlation analysis between KEAP1 methylation levels and expression of NRF2 and ARE-targets in KRAS wild type/mutated in LUAD all stages (**G, H**).

Results from correlation analysis between KEAP1 methylation levels and expression of NRF2 and ARE-targets in KRAS wild type/mutated in LUSC all stages (**I, L**).

A) LUAD\_EGFR\_wild type\_early\_stages

|             |            | <b>NRF2</b> |       | <b>GCLC</b> |       | <b>ABCC2</b> |       | <b>PGD</b> |       | <b>GPX2</b> |       | <b>AKR1C1</b> |       | <b>TXNRD1</b> |       | <b>SRXN1</b> |       |
|-------------|------------|-------------|-------|-------------|-------|--------------|-------|------------|-------|-------------|-------|---------------|-------|---------------|-------|--------------|-------|
| <b>CpG*</b> | <b>CpG</b> | P value     | R     | P value     | R     | P value      | R     | P value    | R     | P value     | R     | P value       | R     | P value       | R     | P value      | R     |
| 1           | cg25801292 | 0,33        | 1,00  | 0,33        | -1,00 | 0,33         | -1,00 | 0,33       | -1,00 | 0,33        | -1,00 | 0,33          | -1,00 | 0,33          | -1,00 | 0,33         | -1,00 |
| 2           | cg02428100 | 1,00        | 0,50  | 1,00        | -0,50 | 1,00         | -0,50 | 1,00       | -0,50 | 1,00        | -0,50 | 1,00          | -0,50 | 1,00          | -0,50 | 1,00         | -0,50 |
| 3           | cg26500801 | 1,00        | 0,50  | 1,00        | -0,50 | 1,00         | -0,50 | 1,00       | -0,50 | 1,00        | -0,50 | 1,00          | -0,50 | 1,00          | -0,50 | 1,00         | -0,50 |
| 4           | cg03890664 | 1,00        | 0,50  | 1,00        | -0,50 | 1,00         | -0,50 | 1,00       | -0,50 | 1,00        | -0,50 | 1,00          | -0,50 | 1,00          | -0,50 | 1,00         | -0,50 |
| 5           | cg15676203 | 1,00        | 0,50  | 1,00        | -0,50 | 1,00         | -0,50 | 1,00       | -0,50 | 1,00        | -0,50 | 1,00          | -0,50 | 1,00          | -0,50 | 1,00         | -0,50 |
| 6           | cg06911149 | 1,00        | 0,50  | 1,00        | -0,50 | 1,00         | -0,50 | 1,00       | -0,50 | 1,00        | -0,50 | 1,00          | -0,50 | 1,00          | -0,50 | 1,00         | -0,50 |
| 7           | cg15204119 | 1,00        | -0,50 | 1,00        | 0,50  | 1,00         | 0,50  | 1,00       | 0,50  | 1,00        | 0,50  | 1,00          | 0,50  | 1,00          | 0,50  | 1,00         | 0,50  |
| 8           | cg26988016 | 1,00        | 0,50  | 1,00        | -0,50 | 1,00         | -0,50 | 1,00       | -0,50 | 1,00        | -0,50 | 1,00          | -0,50 | 1,00          | -0,50 | 1,00         | -0,50 |
| 9           | cg20226327 | 1,00        | 0,50  | 1,00        | -0,50 | 1,00         | -0,50 | 1,00       | -0,50 | 1,00        | -0,50 | 1,00          | -0,50 | 1,00          | -0,50 | 1,00         | -0,50 |
| 10          | cg10505024 | 1,00        | 0,50  | 1,00        | -0,50 | 1,00         | -0,50 | 1,00       | -0,50 | 1,00        | -0,50 | 1,00          | -0,50 | 1,00          | -0,50 | 1,00         | -0,50 |
| 11          | cg07695362 | 1,00        | 0,50  | 1,00        | -0,50 | 1,00         | -0,50 | 1,00       | -0,50 | 1,00        | -0,50 | 1,00          | -0,50 | 1,00          | -0,50 | 1,00         | -0,50 |
| 12          | cg00522555 | 0,33        | -0,87 | 0,33        | 0,87  | 0,33         | 0,87  | 0,33       | 0,87  | 1,00        | -0,50 | 0,33          | 0,87  | 0,33          | 0,87  | 0,33         | 0,87  |
| 13          | cg01018726 | 1,00        | -0,50 | 1,00        | 0,50  | 1,00         | 0,50  | 1,00       | 0,50  | 1,00        | 0,50  | 1,00          | 0,50  | 1,00          | 0,50  | 1,00         | 0,50  |
| 14          | cg22779878 | 1,00        | -0,50 | 1,00        | 0,50  | 1,00         | 0,50  | 1,00       | 0,50  | 1,00        | 0,50  | 1,00          | 0,50  | 1,00          | 0,50  | 1,00         | 0,50  |
| 15          | cg02337283 | 1,00        | -0,50 | 1,00        | 0,50  | 1,00         | 0,50  | 1,00       | 0,50  | 1,00        | 0,50  | 1,00          | 0,50  | 1,00          | 0,50  | 1,00         | 0,50  |
| 16          | cg01586432 | 1,00        | -0,50 | 1,00        | 0,50  | 1,00         | 0,50  | 1,00       | 0,50  | 1,00        | 0,50  | 1,00          | 0,50  | 1,00          | 0,50  | 1,00         | 0,50  |

\*CpG number refers to the position of CpGs indicated in the legend of Figure 8.



**B) LUAD\_EGFR\_mutated\_early\_stages**

| CpG* | CpG        | <b>NRF2</b> |       | <b>GCLC</b> |       | <b>ABCC2</b> |       | <b>PGD</b> |       | <b>GPX2</b> |       | <b>AKR1C1</b> |       | <b>TXNRD1</b> |       | <b>SRXN1</b> |       |
|------|------------|-------------|-------|-------------|-------|--------------|-------|------------|-------|-------------|-------|---------------|-------|---------------|-------|--------------|-------|
|      |            | P value     | R     | P value     | R     | P value      | R     | P value    | R     | P value     | R     | P value       | R     | P value       | R     | P value      | R     |
| 1    | cg25801292 | 0,23        | 0,11  | 0,39        | -0,08 | 0,53         | 0,06  | 0,43       | -0,07 | 0,02        | -0,22 | 0,02          | -0,21 | 0,61          | -0,05 | 0,00         | -0,30 |
| 2    | cg02428100 | 0,93        | 0,01  | 0,26        | 0,10  | 0,10         | 0,15  | 0,50       | -0,06 | 0,72        | 0,03  | 0,76          | -0,03 | 0,27          | 0,10  | 0,29         | 0,10  |
| 3    | cg26500801 | 0,37        | 0,08  | 0,77        | -0,03 | 0,75         | 0,03  | 0,06       | -0,17 | 0,31        | -0,09 | 0,16          | -0,13 | 0,90          | 0,01  | 0,10         | -0,15 |
| 4    | cg03890664 | 0,43        | 0,07  | 0,48        | -0,07 | 0,62         | 0,05  | 0,08       | -0,16 | 0,40        | -0,08 | 0,83          | 0,02  | 0,04          | 0,18  | 0,77         | -0,03 |
| 5    | cg15676203 | 0,21        | 0,12  | 0,67        | 0,04  | 0,84         | 0,02  | 0,35       | -0,09 | 0,50        | 0,06  | 0,98          | 0,00  | 0,09          | 0,16  | 0,38         | -0,08 |
| 6    | cg06911149 | 0,67        | -0,04 | 0,86        | 0,02  | 0,09         | 0,16  | 0,06       | -0,17 | 0,95        | 0,01  | 0,34          | -0,09 | 0,06          | 0,17  | 0,58         | -0,05 |
| 7    | cg15204119 | 0,60        | 0,05  | 0,73        | 0,03  | 0,15         | -0,13 | 0,81       | -0,02 | 0,00        | -0,29 | 0,01          | -0,24 | 0,70          | -0,04 | 0,53         | -0,06 |
| 8    | cg26988016 | 0,28        | 0,10  | 0,48        | 0,07  | 0,04         | 0,19  | 0,95       | -0,01 | 0,18        | -0,12 | 0,85          | 0,02  | 0,00          | 0,33  | 0,75         | -0,03 |
| 9    | cg20226327 | 0,61        | -0,05 | 0,88        | 0,01  | 0,81         | -0,02 | 0,22       | -0,11 | 0,00        | -0,27 | 0,07          | -0,17 | 0,85          | -0,02 | 0,26         | -0,10 |
| 10   | cg10505024 | 0,23        | -0,11 | 0,40        | -0,08 | 0,21         | -0,12 | 0,69       | -0,04 | 0,02        | -0,22 | 0,06          | -0,18 | 0,94          | 0,01  | 0,61         | -0,05 |
| 11   | cg07695362 | 0,24        | -0,11 | 0,73        | 0,03  | 0,28         | -0,10 | 0,80       | -0,02 | 0,27        | -0,10 | 0,39          | -0,08 | 0,32          | -0,09 | 0,80         | -0,02 |
| 12   | cg00522555 | 0,02        | -0,22 | 0,43        | -0,07 | 0,39         | -0,08 | 0,29       | -0,10 | 0,58        | 0,05  | 0,25          | -0,11 | 0,02          | -0,21 | 0,62         | 0,05  |
| 13   | cg01018726 | 0,13        | -0,14 | 0,20        | -0,12 | 0,03         | -0,20 | 0,87       | -0,01 | 0,60        | 0,05  | 0,35          | -0,09 | 0,07          | -0,16 | 0,90         | -0,01 |
| 14   | cg22779878 | 0,02        | -0,21 | 0,02        | -0,22 | 0,15         | -0,13 | 0,56       | -0,05 | 0,09        | -0,16 | 0,00          | -0,26 | 0,95          | 0,01  | 0,39         | -0,08 |
| 15   | cg02337283 | 0,65        | -0,04 | 0,66        | 0,04  | 0,45         | -0,07 | 0,41       | 0,08  | 0,49        | -0,06 | 0,02          | -0,22 | 0,92          | 0,01  | 0,28         | 0,10  |
| 16   | cg01586432 | 0,84        | -0,02 | 0,01        | -0,23 | 0,00         | -0,27 | 0,15       | -0,13 | 0,13        | -0,14 | 0,06          | -0,17 | 0,59          | -0,05 | 0,50         | -0,06 |

\*CpG number refers to the position of CpGs indicated in the legend of Figure 8.

C) LUAD\_EGFR\_wild type\_all\_stages

|             |            | <b>NRF2</b> |       | <b>GCLC</b> |       | <b>ABCC2</b> |       | <b>PGD</b> |       | <b>GPX2</b> |       | <b>AKR1C1</b> |       | <b>TXNRD1</b> |       | <b>SRXN1</b> |       |
|-------------|------------|-------------|-------|-------------|-------|--------------|-------|------------|-------|-------------|-------|---------------|-------|---------------|-------|--------------|-------|
| <b>CpG*</b> | <b>CpG</b> | P value     | R     | P value     | R     | P value      | R     | P value    | R     | P value     | R     | P value       | R     | P value       | R     | P value      | R     |
| 1           | cg25801292 | 0,06        | 0,25  | 0,94        | -0,01 | 0,20         | -0,17 | 0,66       | -0,06 | 0,04        | -0,27 | 0,59          | -0,07 | 0,33          | 0,13  | 0,22         | 0,16  |
| 2           | cg02428100 | 0,44        | -0,11 | 0,57        | -0,08 | 0,48         | -0,09 | 0,94       | -0,01 | 0,21        | 0,17  | 0,93          | 0,01  | 0,32          | -0,13 | 0,24         | 0,16  |
| 3           | cg26500801 | 0,08        | -0,24 | 0,45        | -0,10 | 1,00         | 0,00  | 0,62       | -0,07 | 0,85        | 0,03  | 0,81          | 0,03  | 0,07          | -0,24 | 0,88         | -0,02 |
| 4           | cg03890664 | 0,85        | -0,02 | 0,63        | 0,06  | 0,45         | -0,10 | 0,55       | 0,08  | 0,58        | 0,08  | 0,21          | 0,17  | 0,55          | 0,08  | 0,22         | 0,17  |
| 5           | cg15676203 | 0,10        | -0,22 | 0,42        | -0,11 | 0,72         | -0,05 | 0,20       | -0,17 | 0,40        | 0,11  | 0,44          | -0,10 | 0,28          | -0,14 | 0,97         | 0,00  |
| 6           | cg06911149 | 0,12        | -0,21 | 0,14        | -0,20 | 0,88         | -0,02 | 0,64       | -0,06 | 0,17        | 0,18  | 0,62          | -0,07 | 0,50          | -0,09 | 0,08         | 0,23  |
| 7           | cg15204119 | 0,29        | 0,14  | 0,53        | 0,08  | 0,02         | -0,31 | 0,95       | 0,01  | 0,70        | 0,05  | 0,32          | 0,13  | 0,61          | -0,07 | 0,52         | 0,09  |
| 8           | cg26988016 | 0,07        | -0,24 | 0,08        | -0,23 | 0,45         | -0,10 | 0,90       | -0,02 | 0,26        | -0,15 | 0,39          | -0,12 | 0,48          | -0,10 | 0,37         | -0,12 |
| 9           | cg20226327 | 0,22        | 0,16  | 0,54        | -0,08 | 0,00         | -0,39 | 0,56       | -0,08 | 0,00        | -0,39 | 0,06          | -0,25 | 0,99          | 0,00  | 0,63         | 0,07  |
| 10          | cg10505024 | 0,03        | 0,28  | 0,39        | -0,12 | 0,00         | -0,44 | 0,52       | -0,09 | 0,05        | -0,26 | 0,02          | -0,30 | 0,91          | -0,02 | 0,15         | 0,19  |
| 11          | cg07695362 | 0,81        | 0,03  | 0,72        | -0,05 | 0,31         | -0,14 | 0,10       | -0,22 | 0,05        | -0,26 | 0,03          | -0,28 | 0,76          | -0,04 | 0,53         | 0,08  |
| 12          | cg00522555 | 0,12        | -0,21 | 0,10        | 0,22  | 0,95         | 0,01  | 0,61       | -0,07 | 0,46        | -0,10 | 0,80          | -0,03 | 0,74          | -0,04 | 0,15         | -0,20 |
| 13          | cg01018726 | 0,76        | 0,04  | 0,73        | 0,05  | 0,71         | -0,05 | 0,92       | -0,01 | 0,36        | -0,12 | 0,45          | -0,10 | 0,49          | 0,09  | 0,96         | -0,01 |
| 14          | cg22779878 | 0,85        | 0,03  | 0,27        | -0,15 | 0,37         | -0,12 | 0,60       | -0,07 | 0,57        | -0,08 | 0,18          | -0,18 | 0,64          | 0,06  | 0,09         | 0,23  |
| 15          | cg02337283 | 0,18        | -0,18 | 0,32        | 0,13  | 0,82         | 0,03  | 0,40       | 0,11  | 0,28        | 0,15  | 0,87          | 0,02  | 0,82          | 0,03  | 0,22         | 0,17  |
| 16          | cg01586432 | 0,42        | 0,11  | 0,09        | -0,23 | 0,03         | -0,29 | 0,58       | -0,07 | 0,15        | -0,19 | 0,32          | -0,13 | 0,82          | -0,03 | 0,29         | 0,14  |

\*CpG number refers to the position of CpGs indicated in the legend of Figure 8.

D) LUAD\_EGFR\_mutated\_all\_stages

| CpG* | CpG        | NRF2    |       | GCLC    |       | ABCC2   |       | PGD     |       | GPX2    |       | AKR1C1  |       | TXNRD1  |       | SRXN1   |       |
|------|------------|---------|-------|---------|-------|---------|-------|---------|-------|---------|-------|---------|-------|---------|-------|---------|-------|
|      |            | P value | R     | P value | R     | P value | R     | P value | R     | P value | R     | P value | R     | P value | R     | P value | R     |
| 1    | cg25801292 | 0,31    | 0,05  | 0,02    | -0,11 | 0,36    | 0,05  | 0,00    | -0,18 | 0,19    | -0,07 | 0,08    | -0,09 | 0,11    | -0,08 | 0,00    | -0,16 |
| 2    | cg02428100 | 0,76    | 0,02  | 0,80    | 0,01  | 0,20    | 0,07  | 0,98    | 0,00  | 0,28    | 0,05  | 0,92    | 0,00  | 0,21    | 0,06  | 0,76    | -0,02 |
| 3    | cg26500801 | 0,04    | 0,10  | 0,23    | -0,06 | 0,02    | 0,12  | 0,43    | -0,04 | 0,65    | 0,02  | 0,47    | -0,04 | 0,21    | 0,06  | 0,11    | -0,08 |
| 4    | cg03890664 | 0,72    | 0,02  | 0,55    | -0,03 | 0,75    | 0,02  | 0,07    | -0,09 | 0,42    | -0,04 | 0,41    | -0,04 | 0,31    | 0,05  | 0,07    | -0,09 |
| 5    | cg15676203 | 0,86    | 0,01  | 0,49    | 0,03  | 0,02    | 0,12  | 0,77    | 0,01  | 0,02    | 0,12  | 0,39    | 0,04  | 0,53    | 0,03  | 0,26    | -0,06 |
| 6    | cg06911149 | 0,07    | -0,09 | 0,81    | -0,01 | 0,01    | 0,13  | 0,67    | -0,02 | 0,18    | 0,07  | 0,81    | 0,01  | 0,15    | 0,07  | 0,05    | -0,10 |
| 7    | cg15204119 | 0,66    | 0,02  | 0,54    | 0,03  | 0,66    | 0,02  | 0,38    | 0,04  | 0,35    | -0,05 | 0,09    | -0,09 | 0,80    | 0,01  | 0,95    | 0,00  |
| 8    | cg26988016 | 0,71    | 0,02  | 0,76    | 0,02  | 0,38    | 0,04  | 0,32    | 0,05  | 0,62    | -0,03 | 0,24    | -0,06 | 0,01    | 0,14  | 0,23    | -0,06 |
| 9    | cg20226327 | 0,39    | -0,04 | 0,07    | -0,09 | 0,00    | -0,14 | 0,00    | -0,21 | 0,00    | -0,35 | 0,00    | -0,32 | 0,00    | -0,17 | 0,00    | -0,19 |
| 10   | cg10505024 | 0,30    | -0,05 | 0,32    | -0,05 | 0,01    | -0,14 | 0,00    | -0,17 | 0,00    | -0,28 | 0,00    | -0,28 | 0,15    | -0,07 | 0,01    | -0,14 |
| 11   | cg07695362 | 0,29    | -0,05 | 0,86    | 0,01  | 0,00    | -0,18 | 0,87    | 0,01  | 0,06    | -0,09 | 0,03    | -0,11 | 0,16    | -0,07 | 0,92    | 0,00  |
| 12   | cg00522555 | 0,61    | 0,03  | 0,03    | -0,11 | 0,11    | -0,08 | 0,00    | -0,16 | 0,45    | -0,04 | 0,24    | -0,06 | 0,01    | -0,14 | 0,77    | -0,01 |
| 13   | cg01018726 | 0,22    | -0,06 | 0,04    | -0,10 | 0,26    | -0,06 | 0,11    | -0,08 | 0,35    | -0,05 | 0,20    | -0,06 | 0,19    | -0,07 | 0,99    | 0,00  |
| 14   | cg22779878 | 0,01    | -0,13 | 0,07    | -0,09 | 0,01    | -0,13 | 0,00    | -0,17 | 0,00    | -0,27 | 0,00    | -0,35 | 0,12    | -0,08 | 0,00    | -0,17 |
| 15   | cg02337283 | 0,25    | 0,06  | 0,84    | 0,01  | 0,12    | -0,08 | 0,19    | 0,07  | 0,69    | 0,02  | 0,38    | -0,04 | 0,57    | -0,03 | 0,02    | 0,12  |
| 16   | cg01586432 | 0,49    | -0,04 | 0,00    | -0,21 | 0,00    | -0,26 | 0,00    | -0,14 | 0,00    | -0,27 | 0,00    | -0,27 | 0,01    | -0,13 | 0,01    | -0,13 |

\*CpG number refers to the position of CpGs indicated in the legend of Figure 8.

E) LUAD\_KRAS\_wild type\_early stages

| CpG* | CpG        | <b>NRF2</b> |       | <b>GCLC</b> |       | <b>ABCC2</b> |       | <b>PGD</b> |       | <b>GPX2</b> |       | <b>AKR1C1</b> |       | <b>TXNRD1</b> |       | <b>SRXN1</b> |       |
|------|------------|-------------|-------|-------------|-------|--------------|-------|------------|-------|-------------|-------|---------------|-------|---------------|-------|--------------|-------|
|      |            | P value     | R     | P value     | R     | P value      | R     | P value    | R     | P value     | R     | P value       | R     | P value       | R     | P value      | R     |
| 1    | cg25801292 | 0,26        | 0,11  | 0,09        | -0,17 | 0,49         | 0,07  | 0,24       | -0,12 | 0,06        | -0,18 | 0,01          | -0,25 | 0,42          | -0,08 | 0,00         | -0,32 |
| 2    | cg02428100 | 0,93        | -0,01 | 0,08        | 0,17  | 0,07         | 0,18  | 0,71       | -0,04 | 0,95        | 0,01  | 0,86          | 0,02  | 0,13          | 0,15  | 0,65         | 0,05  |
| 3    | cg26500801 | 0,22        | 0,12  | 0,68        | -0,04 | 0,99         | 0,00  | 0,09       | -0,17 | 0,08        | -0,17 | 0,16          | -0,14 | 0,78          | 0,03  | 0,04         | -0,20 |
| 4    | cg03890664 | 0,88        | 0,01  | 0,38        | -0,09 | 0,59         | 0,05  | 0,10       | -0,16 | 0,10        | -0,16 | 0,87          | -0,02 | 0,17          | 0,14  | 0,19         | -0,13 |
| 5    | cg15676203 | 0,20        | 0,13  | 0,57        | 0,06  | 0,54         | 0,06  | 0,70       | -0,04 | 0,57        | 0,06  | 0,87          | 0,02  | 0,06          | 0,19  | 0,26         | -0,11 |
| 6    | cg06911149 | 0,98        | 0,00  | 0,53        | 0,06  | 0,04         | 0,20  | 0,12       | -0,15 | 0,83        | -0,02 | 0,83          | -0,02 | 0,02          | 0,23  | 0,33         | -0,10 |
| 7    | cg15204119 | 0,74        | -0,03 | 0,65        | 0,04  | 0,48         | -0,07 | 0,75       | -0,03 | 0,00        | -0,31 | 0,01          | -0,27 | 0,83          | -0,02 | 0,42         | -0,08 |
| 8    | cg26988016 | 0,32        | 0,10  | 0,41        | 0,08  | 0,06         | 0,19  | 0,70       | -0,04 | 0,19        | -0,13 | 0,81          | -0,02 | 0,00          | 0,33  | 0,49         | -0,07 |
| 9    | cg20226327 | 0,99        | 0,00  | 0,78        | 0,03  | 0,96         | 0,00  | 0,15       | -0,14 | 0,01        | -0,26 | 0,25          | -0,11 | 0,86          | 0,02  | 0,20         | -0,13 |
| 10   | cg10505024 | 0,33        | -0,10 | 0,97        | 0,00  | 0,49         | -0,07 | 0,62       | -0,05 | 0,07        | -0,18 | 0,44          | -0,08 | 0,46          | 0,07  | 0,40         | -0,08 |
| 11   | cg07695362 | 0,31        | -0,10 | 0,63        | 0,05  | 0,44         | -0,08 | 0,89       | -0,01 | 0,59        | -0,05 | 0,96          | 0,00  | 0,75          | -0,03 | 0,84         | -0,02 |
| 12   | cg00522555 | 0,13        | -0,15 | 0,17        | -0,14 | 0,08         | -0,17 | 0,23       | -0,12 | 0,72        | 0,04  | 0,22          | -0,12 | 0,02          | -0,24 | 0,44         | 0,08  |
| 13   | cg01018726 | 0,13        | -0,15 | 0,26        | -0,11 | 0,03         | -0,21 | 0,37       | -0,09 | 0,44        | 0,08  | 0,45          | -0,08 | 0,09          | -0,17 | 0,88         | -0,01 |
| 14   | cg22779878 | 0,04        | -0,21 | 0,11        | -0,16 | 0,18         | -0,13 | 0,41       | -0,08 | 0,09        | -0,17 | 0,01          | -0,24 | 0,39          | 0,09  | 0,14         | -0,15 |
| 15   | cg02337283 | 0,80        | -0,03 | 0,63        | 0,05  | 0,46         | -0,07 | 0,59       | 0,05  | 0,51        | -0,07 | 0,04          | -0,21 | 0,96          | 0,01  | 0,60         | 0,05  |
| 16   | cg01586432 | 0,81        | -0,02 | 0,10        | -0,16 | 0,02         | -0,23 | 0,17       | -0,13 | 0,20        | -0,13 | 0,25          | -0,11 | 0,69          | 0,04  | 0,47         | -0,07 |

\*CpG number refers to the position of CpGs indicated in the legend of Figure 8.

F) LUAD\_KRAS mutated\_early stages

|             |            | <b>NRF2</b> |       | <b>GCLC</b> |       | <b>ABCC2</b> |       | <b>PGD</b> |       | <b>GPX2</b> |       | <b>AKR1C1</b> |       | <b>TXNRD1</b> |       | <b>SRXN1</b> |       |
|-------------|------------|-------------|-------|-------------|-------|--------------|-------|------------|-------|-------------|-------|---------------|-------|---------------|-------|--------------|-------|
| <b>CpG*</b> | <b>CpG</b> | P value     | R     | P value     | R     | P value      | R     | P value    | R     | P value     | R     | P value       | R     | P value       | R     | P value      | R     |
| 1           | cg25801292 | 0,61        | 0,13  | 0,23        | 0,30  | 0,84         | -0,05 | 0,56       | 0,15  | 0,01        | -0,61 | 0,95          | -0,02 | 0,78          | -0,07 | 0,55         | -0,15 |
| 2           | cg02428100 | 0,54        | 0,16  | 0,15        | -0,35 | 0,97         | -0,01 | 0,43       | -0,20 | 0,84        | 0,05  | 0,11          | -0,39 | 0,23          | -0,30 | 0,25         | 0,28  |
| 3           | cg26500801 | 0,31        | -0,25 | 0,88        | -0,04 | 0,40         | 0,21  | 0,41       | -0,21 | 0,33        | 0,24  | 0,51          | -0,16 | 0,43          | -0,20 | 0,54         | 0,16  |
| 4           | cg03890664 | 0,36        | 0,23  | 0,23        | -0,30 | 0,50         | -0,17 | 0,49       | -0,17 | 1,00        | 0,00  | 0,61          | -0,13 | 0,90          | -0,03 | 0,31         | 0,25  |
| 5           | cg15676203 | 0,86        | 0,04  | 0,67        | -0,11 | 0,50         | -0,17 | 0,15       | -0,35 | 0,74        | 0,09  | 0,57          | -0,14 | 0,23          | -0,30 | 0,63         | 0,12  |
| 6           | cg06911149 | 0,43        | -0,20 | 0,11        | -0,39 | 0,75         | -0,08 | 0,14       | -0,36 | 0,60        | 0,13  | 0,02          | -0,55 | 0,08          | -0,42 | 0,59         | 0,14  |
| 7           | cg15204119 | 0,25        | 0,29  | 0,59        | -0,14 | 0,04         | -0,49 | 0,87       | -0,04 | 0,26        | -0,28 | 0,31          | -0,25 | 0,30          | -0,26 | 0,90         | -0,03 |
| 8           | cg26988016 | 0,37        | 0,22  | 0,29        | -0,26 | 0,93         | 0,02  | 0,95       | -0,02 | 0,56        | -0,15 | 0,91          | 0,03  | 0,86          | 0,05  | 0,56         | 0,15  |
| 9           | cg20226327 | 0,40        | -0,21 | 0,17        | -0,34 | 0,37         | -0,23 | 0,66       | -0,11 | 0,12        | -0,38 | 0,02          | -0,56 | 0,14          | -0,36 | 0,86         | -0,05 |
| 10          | cg10505024 | 0,96        | 0,01  | 0,01        | -0,58 | 0,20         | -0,32 | 0,64       | -0,12 | 0,21        | -0,31 | 0,00          | -0,67 | 0,20          | -0,31 | 0,47         | 0,18  |
| 11          | cg07695362 | 0,82        | -0,06 | 0,34        | -0,24 | 0,12         | -0,38 | 0,48       | -0,18 | 0,11        | -0,39 | 0,03          | -0,51 | 0,05          | -0,47 | 0,97         | 0,01  |
| 12          | cg00522555 | 0,00        | -0,66 | 0,07        | 0,44  | 0,03         | 0,51  | 0,44       | 0,20  | 0,20        | 0,32  | 0,61          | 0,13  | 0,38          | 0,22  | 0,93         | 0,02  |
| 13          | cg01018726 | 0,44        | 0,20  | 0,95        | 0,02  | 0,37         | -0,22 | 0,29       | 0,26  | 0,78        | 0,07  | 0,66          | 0,11  | 0,69          | 0,10  | 0,65         | 0,11  |
| 14          | cg22779878 | 0,52        | -0,16 | 0,01        | -0,57 | 0,84         | -0,05 | 0,81       | -0,06 | 0,70        | 0,10  | 0,10          | -0,40 | 0,20          | -0,32 | 0,27         | 0,28  |
| 15          | cg02337283 | 0,39        | -0,22 | 0,94        | 0,02  | 0,49         | 0,18  | 0,08       | 0,42  | 0,76        | -0,08 | 0,72          | -0,09 | 0,76          | 0,08  | 0,07         | 0,43  |
| 16          | cg01586432 | 0,94        | 0,02  | 0,01        | -0,58 | 0,19         | -0,32 | 0,45       | -0,19 | 0,91        | -0,03 | 0,04          | -0,50 | 0,09          | -0,41 | 0,58         | 0,14  |

\*CpG number refers to the position of CpGs indicated in the legend of Figure 8.

**G) LUAD\_KRAS wild type\_all stages**

| CpG* | CpG        | <b>NRF2</b> |       | <b>GCLC</b> |       | <b>ABCC2</b> |       | <b>PGD</b> |       | <b>GPX2</b> |       | <b>AKR1C1</b> |       | <b>TXNRD1</b> |       | <b>SRXN1</b> |       |
|------|------------|-------------|-------|-------------|-------|--------------|-------|------------|-------|-------------|-------|---------------|-------|---------------|-------|--------------|-------|
|      |            | P value     | R     | P value     | R     | P value      | R     | P value    | R     | P value     | R     | P value       | R     | P value       | R     | P value      | R     |
| 1    | cg25801292 | 0,03        | -0,11 | 0,09        | 0,09  | 0,00         | 1,00  | 0,00       | 0,17  | 0,11        | -0,08 | 0,01          | -0,13 | 0,88          | 0,01  | 0,01         | 0,14  |
| 2    | cg02428100 | 0,89        | 0,01  | 0,96        | 0,00  | 0,03         | 0,11  | 0,81       | 0,01  | 0,00        | -0,33 | 0,00          | -0,23 | 0,54          | -0,03 | 1,00         | 0,00  |
| 3    | cg26500801 | 0,01        | -0,12 | 0,18        | -0,07 | 0,03         | 0,11  | 0,27       | -0,06 | 0,00        | -0,23 | 0,01          | -0,13 | 0,00          | -0,23 | 0,22         | -0,06 |
| 4    | cg03890664 | 0,22        | -0,06 | 0,77        | -0,02 | 0,02         | 0,12  | 0,47       | 0,04  | 0,00        | -0,30 | 0,00          | -0,34 | 0,70          | -0,02 | 0,83         | 0,01  |
| 5    | cg15676203 | 0,03        | -0,11 | 0,27        | -0,06 | 0,03         | 0,11  | 0,97       | 0,00  | 0,00        | -0,39 | 0,00          | -0,36 | 0,43          | -0,04 | 0,68         | -0,02 |
| 6    | cg06911149 | 0,01        | -0,13 | 0,17        | -0,07 | 0,00         | 0,17  | 0,66       | 0,02  | 0,00        | -0,40 | 0,00          | -0,35 | 0,32          | -0,05 | 0,96         | 0,00  |
| 7    | cg15204119 | 0,03        | 0,11  | 0,48        | -0,04 | 0,63         | 0,02  | 0,58       | 0,03  | 0,02        | -0,12 | 0,00          | -0,17 | 0,09          | 0,09  | 0,80         | 0,01  |
| 8    | cg26988016 | 0,04        | -0,10 | 0,14        | 0,07  | 0,00         | 0,16  | 0,01       | 0,14  | 0,00        | -0,26 | 0,00          | -0,33 | 0,95          | 0,00  | 0,02         | 0,11  |
| 9    | cg20226327 | 0,76        | 0,02  | 0,00        | 0,42  | 0,00         | 0,19  | 0,00       | 0,49  | 0,32        | 0,05  | 0,72          | -0,02 | 0,00          | 0,29  | 0,00         | 0,78  |
| 10   | cg10505024 | 0,68        | 0,02  | 0,00        | 0,48  | 0,01         | 0,14  | 0,00       | 0,65  | 0,21        | 0,06  | 0,07          | -0,09 | 0,00          | 0,37  | 0,00         | 1,00  |
| 11   | cg07695362 | 0,00        | 0,18  | 0,00        | 0,26  | 0,88         | 0,01  | 0,00       | 0,31  | 0,15        | 0,07  | 0,01          | -0,14 | 0,00          | 1,00  | 0,00         | 0,37  |
| 12   | cg00522555 | 0,00        | 0,23  | 0,25        | 0,06  | 0,01         | -0,13 | 0,06       | -0,10 | 0,00        | 0,45  | 0,00          | 1,00  | 0,01          | -0,14 | 0,07         | -0,09 |
| 13   | cg01018726 | 0,00        | 0,20  | 0,04        | 0,10  | 0,11         | -0,08 | 0,56       | 0,03  | 0,00        | 1,00  | 0,00          | 0,45  | 0,15          | 0,07  | 0,21         | 0,06  |
| 14   | cg22779878 | 0,06        | 0,10  | 0,00        | 0,50  | 0,00         | 0,17  | 0,00       | 1,00  | 0,56        | 0,03  | 0,06          | -0,10 | 0,00          | 0,31  | 0,00         | 0,65  |
| 15   | cg02337283 | 0,00        | 1,00  | 0,01        | 0,13  | 0,03         | -0,11 | 0,06       | 0,10  | 0,00        | 0,20  | 0,00          | 0,23  | 0,00          | 0,18  | 0,68         | 0,02  |
| 16   | cg01586432 | 0,01        | 0,13  | 0,00        | 1,00  | 0,09         | 0,09  | 0,00       | 0,50  | 0,04        | 0,10  | 0,25          | 0,06  | 0,00          | 0,26  | 0,00         | 0,48  |

\*CpG number refers to the position of CpGs indicated in the legend of Figure 8.

H) LUAD\_KRAS mutated\_all stages

| CpG* | CpG        | <b>NRF2</b> |       | <b>GCLC</b> |       | <b>ABCC2</b> |       | <b>PGD</b> |       | <b>GPX2</b> |       | <b>AKR1C1</b> |       | <b>TXNRD1</b> |       | <b>SRXN1</b> |       |
|------|------------|-------------|-------|-------------|-------|--------------|-------|------------|-------|-------------|-------|---------------|-------|---------------|-------|--------------|-------|
|      |            | P value     | R     | P value     | R     | P value      | R     | P value    | R     | P value     | R     | P value       | R     | P value       | R     | P value      | R     |
| 1    | cg25801292 | 0,57        | 0,07  | 0,82        | 0,03  | 0,53         | -0,08 | 1,00       | 0,00  | 0,05        | -0,25 | 0,73          | -0,04 | 0,83          | 0,03  | 0,91         | -0,01 |
| 2    | cg02428100 | 0,18        | -0,17 | 0,75        | -0,04 | 0,64         | 0,06  | 0,64       | 0,06  | 0,25        | 0,15  | 0,96          | -0,01 | 0,72          | -0,05 | 0,08         | 0,23  |
| 3    | cg26500801 | 0,10        | -0,21 | 0,85        | -0,02 | 0,70         | 0,05  | 0,99       | 0,00  | 0,77        | 0,04  | 0,97          | -0,01 | 0,43          | -0,10 | 0,22         | 0,16  |
| 4    | cg03890664 | 0,23        | 0,16  | 0,68        | 0,05  | 0,30         | -0,13 | 0,43       | 0,10  | 0,89        | -0,02 | 0,54          | 0,08  | 0,42          | 0,10  | 0,08         | 0,22  |
| 5    | cg15676203 | 0,57        | -0,07 | 0,23        | -0,16 | 0,71         | -0,05 | 0,33       | -0,13 | 0,48        | 0,09  | 0,81          | -0,03 | 0,46          | -0,10 | 0,31         | 0,13  |
| 6    | cg06911149 | 0,02        | -0,30 | 0,07        | -0,23 | 0,32         | -0,13 | 0,21       | -0,16 | 0,75        | 0,04  | 0,02          | -0,30 | 0,32          | -0,13 | 0,21         | 0,16  |
| 7    | cg15204119 | 0,61        | 0,07  | 0,89        | -0,02 | 0,07         | -0,23 | 0,78       | 0,04  | 0,79        | 0,03  | 0,46          | 0,10  | 0,49          | -0,09 | 0,56         | 0,07  |
| 8    | cg26988016 | 0,88        | -0,02 | 0,37        | -0,12 | 0,50         | -0,09 | 0,18       | 0,17  | 0,20        | -0,16 | 0,71          | -0,05 | 0,88          | -0,02 | 0,74         | 0,04  |
| 9    | cg20226327 | 0,86        | 0,02  | 0,30        | -0,13 | 0,18         | -0,17 | 0,90       | -0,02 | 0,09        | -0,22 | 0,02          | -0,30 | 0,13          | -0,20 | 0,68         | 0,05  |
| 10   | cg10505024 | 0,88        | 0,02  | 0,35        | -0,12 | 0,19         | -0,17 | 0,99       | 0,00  | 0,28        | -0,14 | 0,01          | -0,32 | 0,39          | -0,11 | 0,38         | 0,11  |
| 11   | cg07695362 | 0,73        | -0,04 | 0,15        | -0,18 | 0,01         | -0,35 | 0,12       | -0,20 | 0,02        | -0,29 | 0,01          | -0,35 | 0,03          | -0,27 | 0,92         | -0,01 |
| 12   | cg00522555 | 0,05        | -0,25 | 0,35        | 0,12  | 0,49         | 0,09  | 0,48       | -0,09 | 0,98        | 0,00  | 0,41          | -0,11 | 0,90          | 0,02  | 0,45         | -0,10 |
| 13   | cg01018726 | 0,61        | 0,07  | 0,97        | 0,01  | 0,96         | -0,01 | 0,63       | 0,06  | 0,73        | 0,05  | 0,80          | 0,03  | 0,40          | 0,11  | 0,67         | 0,05  |
| 14   | cg22779878 | 0,35        | -0,12 | 0,18        | -0,17 | 0,41         | -0,11 | 0,84       | 0,03  | 0,79        | -0,03 | 0,18          | -0,17 | 0,37          | -0,12 | 0,29         | 0,14  |
| 15   | cg02337283 | 0,28        | -0,14 | 0,69        | -0,05 | 0,79         | 0,03  | 0,07       | 0,23  | 0,32        | 0,13  | 0,39          | 0,11  | 0,19          | 0,17  | 0,33         | 0,12  |
| 16   | cg01586432 | 0,63        | 0,06  | 0,02        | -0,30 | 0,01         | -0,31 | 0,31       | -0,13 | 0,26        | -0,14 | 0,10          | -0,21 | 0,05          | -0,25 | 0,57         | 0,07  |

\*CpG number refers to the position of CpGs indicated in the legend of Figure 8.

I) LUSC\_KRAS\_wild type\_all stages

| CpG* | CpG        | <b>NRF2</b> |       | <b>GCLC</b> |       | <b>ABCC2</b> |       | <b>PGD</b> |       | <b>GPX2</b> |       | <b>AKR1C1</b> |       | <b>TXNRD1</b> |       | <b>SRXN1</b> |       |
|------|------------|-------------|-------|-------------|-------|--------------|-------|------------|-------|-------------|-------|---------------|-------|---------------|-------|--------------|-------|
|      |            | P value     | R     | P value     | R     | P value      | R     | P value    | R     | P value     | R     | P value       | R     | P value       | R     | P value      | R     |
| 1    | cg25801292 | 0,00        | -0,24 | 0,00        | -0,18 | 0,59         | 0,03  | 0,00       | -0,16 | 0,00        | -0,20 | 0,00          | -0,16 | 0,04          | -0,11 | 0,31         | -0,05 |
| 2    | cg02428100 | 0,10        | -0,09 | 0,54        | 0,03  | 0,74         | -0,02 | 0,28       | -0,06 | 0,16        | -0,07 | 0,25          | -0,06 | 0,69          | -0,02 | 0,18         | -0,07 |
| 3    | cg26500801 | 0,11        | -0,09 | 0,82        | -0,01 | 0,88         | -0,01 | 0,05       | -0,10 | 0,24        | -0,06 | 0,08          | -0,09 | 0,36          | -0,05 | 0,29         | -0,06 |
| 4    | cg03890664 | 0,91        | -0,01 | 0,17        | 0,07  | 0,46         | 0,04  | 0,96       | 0,00  | 0,60        | 0,03  | 0,78          | 0,02  | 0,37          | 0,05  | 0,79         | -0,01 |
| 5    | cg15676203 | 0,02        | -0,12 | 0,50        | -0,04 | 0,55         | 0,03  | 0,20       | -0,07 | 0,21        | -0,07 | 0,25          | -0,06 | 0,45          | -0,04 | 0,77         | -0,02 |
| 6    | cg06911149 | 0,26        | -0,06 | 0,72        | 0,02  | 0,46         | 0,04  | 0,09       | -0,09 | 0,36        | -0,05 | 0,31          | -0,06 | 0,20          | -0,07 | 0,41         | -0,04 |
| 7    | cg15204119 | 0,11        | -0,09 | 0,33        | -0,05 | 0,96         | 0,00  | 0,02       | -0,12 | 0,66        | -0,02 | 0,03          | -0,11 | 0,01          | -0,13 | 0,04         | -0,11 |
| 8    | cg26988016 | 0,84        | -0,01 | 0,12        | -0,08 | 0,94         | 0,00  | 0,02       | -0,12 | 0,02        | -0,13 | 0,08          | -0,09 | 0,06          | -0,10 | 0,07         | -0,10 |
| 9    | cg20226327 | 0,00        | -0,23 | 0,00        | -0,20 | 0,02         | -0,12 | 0,00       | -0,25 | 0,00        | -0,26 | 0,00          | -0,22 | 0,00          | -0,18 | 0,00         | -0,18 |
| 10   | cg10505024 | 0,00        | -0,23 | 0,00        | -0,22 | 0,19         | -0,07 | 0,00       | -0,16 | 0,00        | -0,18 | 0,00          | -0,18 | 0,01          | -0,14 | 0,03         | -0,11 |
| 11   | cg07695362 | 0,04        | -0,11 | 0,02        | -0,12 | 0,14         | -0,08 | 0,10       | -0,09 | 0,01        | -0,14 | 0,02          | -0,13 | 0,04          | -0,11 | 0,09         | -0,09 |
| 12   | cg00522555 | 0,40        | 0,04  | 0,91        | -0,01 | 0,14         | -0,08 | 0,57       | -0,03 | 0,78        | 0,01  | 0,81          | -0,01 | 0,68          | -0,02 | 0,23         | -0,06 |
| 13   | cg01018726 | 0,21        | 0,07  | 0,65        | -0,02 | 0,93         | 0,00  | 0,21       | 0,07  | 0,37        | 0,05  | 0,23          | 0,06  | 0,97          | 0,00  | 0,88         | 0,01  |
| 14   | cg22779878 | 0,00        | -0,34 | 0,00        | -0,26 | 0,93         | 0,00  | 0,00       | -0,21 | 0,00        | -0,27 | 0,00          | -0,26 | 0,00          | -0,20 | 0,01         | -0,13 |
| 15   | cg02337283 | 0,08        | -0,10 | 0,03        | -0,11 | 0,08         | -0,09 | 0,50       | -0,04 | 0,03        | -0,12 | 0,01          | -0,13 | 0,08          | -0,09 | 0,52         | -0,03 |
| 16   | cg01586432 | 0,09        | -0,09 | 0,19        | -0,07 | 0,08         | 0,09  | 0,39       | 0,05  | 0,95        | 0,00  | 0,87          | 0,01  | 0,32          | 0,05  | 0,05         | 0,10  |

\*CpG number refers to the position of CpGs indicated in the legend of Figure 8.

L) LUSC\_KRAS mutated\_all stages



|             |            | <b>NRF2</b> |       | <b>GCLC</b> |       | <b>ABCC2</b> |       | <b>PGD</b> |       | <b>GPX2</b> |       | <b>AKR1C1</b> |       | <b>TXNRD1</b> |       | <b>SRXN1</b> |       |
|-------------|------------|-------------|-------|-------------|-------|--------------|-------|------------|-------|-------------|-------|---------------|-------|---------------|-------|--------------|-------|
| <b>CpG*</b> | <b>CpG</b> | P value     | R     | P value     | R     | P value      | R     | P value    | R     | P value     | R     | P value       | R     | P value       | R     | P value      | R     |
| 1           | cg25801292 | 0,70        | -0,11 | 0,43        | -0,22 | 0,57         | -0,16 | 0,66       | 0,13  | 0,98        | 0,01  | 0,70          | -0,11 | 0,68          | 0,12  | 0,83         | -0,06 |
| 2           | cg02428100 | 0,53        | -0,18 | 0,18        | 0,37  | 0,08         | 0,47  | 0,49       | 0,19  | 0,55        | 0,17  | 0,40          | 0,24  | 0,35          | 0,26  | 0,90         | 0,04  |
| 3           | cg26500801 | 0,86        | 0,05  | 0,59        | 0,15  | 0,10         | 0,44  | 0,44       | 0,21  | 0,70        | 0,11  | 0,62          | 0,14  | 0,99          | 0,00  | 0,60         | -0,15 |
| 4           | cg03890664 | 0,22        | 0,34  | 0,05        | 0,52  | 0,22         | 0,34  | 0,09       | 0,45  | 0,26        | 0,31  | 0,08          | 0,47  | 0,17          | 0,38  | 0,31         | 0,28  |
| 5           | cg15676203 | 0,55        | 0,17  | 0,03        | 0,56  | 0,05         | 0,52  | 0,13       | 0,41  | 0,21        | 0,34  | 0,15          | 0,39  | 0,23          | 0,33  | 0,61         | 0,14  |
| 6           | cg06911149 | 0,96        | 0,01  | 0,28        | 0,30  | 0,11         | 0,44  | 0,29       | 0,29  | 0,52        | 0,18  | 0,59          | 0,15  | 0,84          | 0,06  | 0,98         | -0,01 |
| 7           | cg15204119 | 0,19        | 0,36  | 0,09        | 0,46  | 0,06         | 0,49  | 0,02       | 0,62  | 0,12        | 0,42  | 0,10          | 0,45  | 0,34          | 0,26  | 0,35         | 0,26  |
| 8           | cg26988016 | 0,28        | 0,30  | 0,75        | 0,09  | 0,70         | 0,11  | 0,73       | 0,10  | 0,94        | -0,02 | 0,98          | 0,01  | 0,71          | -0,10 | 0,82         | -0,06 |
| 9           | cg20226327 | 0,43        | -0,22 | 0,14        | -0,40 | 0,06         | -0,50 | 0,18       | -0,36 | 0,09        | -0,45 | 0,08          | -0,47 | 0,19          | -0,36 | 0,25         | -0,32 |
| 10          | cg10505024 | 0,17        | -0,38 | 0,24        | -0,33 | 0,31         | -0,28 | 0,33       | -0,27 | 0,52        | -0,18 | 0,33          | -0,27 | 0,97          | -0,01 | 0,92         | 0,03  |
| 11          | cg07695362 | 0,63        | -0,14 | 0,96        | -0,01 | 0,09         | -0,45 | 0,62       | -0,14 | 0,74        | -0,09 | 0,80          | -0,07 | 0,97          | 0,01  | 0,74         | -0,09 |
| 12          | cg00522555 | 0,15        | -0,39 | 0,09        | -0,45 | 0,45         | -0,21 | 0,10       | -0,44 | 0,16        | -0,38 | 0,13          | -0,41 | 0,21          | -0,34 | 0,30         | -0,28 |
| 13          | cg01018726 | 0,22        | -0,34 | 0,05        | -0,52 | 0,31         | -0,28 | 0,08       | -0,46 | 0,26        | -0,31 | 0,09          | -0,46 | 0,22          | -0,34 | 0,30         | -0,28 |
| 14          | cg22779878 | 0,01        | -0,69 | 0,07        | -0,48 | 0,65         | -0,13 | 0,01       | -0,63 | 0,04        | -0,54 | 0,05          | -0,53 | 0,20          | -0,35 | 0,15         | -0,39 |
| 15          | cg02337283 | 0,45        | 0,21  | 0,59        | -0,15 | 0,35         | -0,26 | 0,71       | -0,10 | 0,99        | 0,00  | 0,84          | 0,06  | 0,91          | 0,03  | 0,74         | 0,09  |
| 16          | cg01586432 | 0,02        | -0,59 | 0,19        | -0,36 | 0,83         | -0,06 | 0,18       | -0,37 | 0,60        | -0,15 | 0,36          | -0,25 | 0,72          | -0,10 | 0,78         | -0,08 |

\*CpG number refers to the position of CpGs indicated in the legend of Figure 8.
